# Supplementary material for: Identification of Important Genes of childhood autism and Construction of the Diagnostic Model
Source: Research Square preprint supplement (doi:10.21203/rs.3.rs-4008435/v1), 2024-03-07
Supplement: Supplementary file 1 [file 154b00cda0967bc27c07041a.docx]

**Table 2. List of immunosignificantly associated DEGs significantly associated GO biological processes and KEGG signaling pathways.**

| **Category** | **Term** | **Count** | **PValue** |
| --- | --- | --- | --- |
| Biology Process | GO:0043065~positive regulation of apoptotic process | 15 | 2.35E-04 |
|  | GO:0006954~inflammatory response | 17 | 2.64E-04 |
|  | GO:0050900~leukocyte migration | 9 | 5.94E-04 |
|  | GO:0043066~negative regulation of apoptotic process | 18 | 7.00E-04 |
|  | GO:0015992~proton transport | 6 | 9.05E-04 |
|  | GO:0006928~movement of cell or subcellular component | 7 | 2.09E-03 |
|  | GO:0055114~oxidation-reduction process | 19 | 4.72E-03 |
|  | GO:0031295~T cell costimulation | 6 | 6.99E-03 |
|  | GO:0008286~insulin receptor signaling pathway | 6 | 6.99E-03 |
|  | GO:0030307~positive regulation of cell growth | 6 | 9.50E-03 |
|  | GO:0006955~immune response | 14 | 1.35E-02 |
|  | GO:0032496~response to lipopolysaccharide | 8 | 1.35E-02 |
|  | GO:0008584~male gonad development | 6 | 1.49E-02 |
|  | GO:0030036~actin cytoskeleton organization | 7 | 1.52E-02 |
|  | GO:0045087~innate immune response | 14 | 1.59E-02 |
|  | GO:0002223~stimulatory C-type lectin receptor signaling pathway | 6 | 2.30E-02 |
|  | GO:0098609~cell-cell adhesion | 10 | 2.47E-02 |
|  | GO:0000187~activation of MAPK activity | 6 | 2.47E-02 |
|  | GO:0007165~signal transduction | 27 | 3.42E-02 |
|  | GO:0006935~chemotaxis | 6 | 4.01E-02 |
|  | GO:0000165~MAPK cascade | 9 | 4.99E-02 |
|  | GO:0001666~response to hypoxia | 7 | 4.99E-02 |
| KEGG Pathway | hsa04145:Phagosome | 20 | 2.05E-10 |
|  | hsa04966:Collecting duct acid secretion | 5 | 2.22E-03 |
|  | hsa04142:Lysosome | 9 | 3.73E-03 |
|  | hsa04010:MAPK signaling pathway | 13 | 6.58E-03 |
|  | hsa04064:NF-kappa B signaling pathway | 7 | 9.54E-03 |
|  | hsa04662:B cell receptor signaling pathway | 6 | 1.44E-02 |
|  | hsa04612:Antigen processing and presentation | 6 | 2.11E-02 |
|  | hsa04620:Toll-like receptor signaling pathway | 7 | 2.34E-02 |
|  | hsa05205:Proteoglycans in cancer | 10 | 2.41E-02 |
|  | hsa04062:Chemokine signaling pathway | 9 | 4.10E-02 |
|  | hsa04650:Natural killer cell mediated cytotoxicity | 7 | 4.24E-02 |
|  | hsa04014:Ras signaling pathway | 10 | 4.71E-02 |
