# Supplementary material for: Identification of Important Genes of childhood autism and Construction of the Diagnostic Model
Source: Research Square preprint supplement (doi:10.21203/rs.3.rs-4008435/v1), 2024-03-07
Supplement: Supplementary file 2 [file 33421a2ff85fd974ce93bd0b.docx]

**Table 1 Data set information included in this analysis**

|  |  |  |  |  |  |
| --- | --- | --- | --- | --- | --- |
| **ID** | **Platform** | **#Total sample** | **#Normal** | **#ASD** |  |
| GSE111175 | GPL10558 Illumina | 141 | 70 | 28 |  |
| GSE18123 | GPL6244 Affymetrix | 285 | 82 | 41 |  |
| GSE6575 | GPL570 Affymetrix | 56 | 12 | 35 |  |
| GSE123302 | GPL16686 Affymetrix | 224 | 171 | 53 |  |
|  |  |  |  |  |  |
