# Supplementary material for: Identification of Important Genes of childhood autism and Construction of the Diagnostic Model
Source: Research Square preprint supplement (doi:10.21203/rs.3.rs-4008435/v1), 2024-03-07
Supplement: Supplementary file 3 [file ea83a5a9bd9730cfd60b7525.docx]

Table 3. Module statistics table

| **ID** | **Color** | **Module size** | **#Immune related DEGs** | **Enrichment infor** | |
| --- | --- | --- | --- | --- | --- |
| **Enrichment fold[95%CI]** | **Phyper** |
| module 1 | black | 131 | 1 | 0.310[0.00774-1.787] | 3.77E-01 |
| module 2 | blue | 346 | 4 | 0.469[0.125-1.241] | 1.46E-01 |
| module 3 | brown | 345 | 60 | 7.057[5.022-9.827] | 2.20E-16 |
| module 4 | green | 178 | 5 | 1.141[0.360-2.778] | 6.30E-01 |
| module 5 | grey | 860 | 6 | 0.283[0.102-0.635] | 4.23E-04 |
| module 6 | magenta | 110 | - | - | - |
| module 7 | pink | 114 | 18 | 6.407[3.563-10.958] | 8.32E-09 |
| module 8 | red | 154 | 1 | 0.263[0.00659-1.516] | 2.73E-01 |
| module 9 | turquoise | 2994 | - | - | - |
| module 10 | yellow | 331 | 42 | 5.149[3.492-7.471] | 1.05E-14 |
